# Supplementary material for: Early experience of COVID-19 vaccination in adults with systemic rheumatic diseases: results from the COVID-19 Global Rheumatology Alliance Vaccine Survey
Source: PubMed Central journal article supplement — RMD Open. 2021 Sep 7;7(3):e001814. doi: 10.1136/rmdopen-2021-001814 (PMC8424419; doi:10.1136/rmdopen-2021-001814), 2021-09-07
Supplement: rmdopen-2021-001814supp001.pdf [file rmdopen-2021-001814supp001.pdf]

**Supplemental Table.** Willingness to temporarily or permanently discontinue medications when receiving the COVID-19 vaccine.

|                          | N   | Yes - willing to discontinue<br>n (%) | No - not willing to discontinue<br>n (%) | Not sure<br>n (%) |
|--------------------------|-----|---------------------------------------|------------------------------------------|-------------------|
| Systemic glucocorticoids | 762 | 375 (49.2)                            | 246 (32.3)                               | 141 (18.5)        |
| NSAIDs                   | 740 | 570 (77.0)                            | 94 (12.7)                                | 76 (10.3)         |
| Antimalarials            | 733 | 569 (77.6)                            | 65 (8.9)                                 | 99 (13.5)         |
| Methotrexate             | 855 | 700 (81.9)                            | 59 (6.9)                                 | 96 (11.2)         |
| Other csDMARDs*          | 510 | 379 (74.2)                            | 60 (11.8)                                | 71 (13.9)         |
| Mycophenolate            | 228 | 160 (70.2)                            | 30 (13.2)                                | 38 (16.7)         |
| Other antimetabolites**  | 21  | 12 (57.1)                             | 5 (23.8)                                 | 4 (19.0)          |
| Abatacept                | 71  | 61 (85.9)                             | 4 (5.6)                                  | 6 (8.5)           |
| Rituximab                | 162 | 110 (67.9)                            | 23 (14.2)                                | 29 (17.9)         |
| TNF inhibitors           | 493 | 358 (72.6)                            | 58 (11.8)                                | 77 (15.6)         |
| Other biologics***       | 206 | 139 (67.5)                            | 28 (13.6)                                | 39 (18.9)         |
| JAK inhibitors           | 121 | 104 (86.0)                            | 10 (8.3)                                 | 7 (5.8)           |
| IVIG                     | 102 | 59 (57.8)                             | 25 (24.5)                                | 18 (17.6)         |

IL = interleukin; NSAIDs = non-steroidal anti-inflammatory drugs; csDMARDs = conventional synthetic drug modifying antirheumatic drugs; JAK = janus kinase inhibitors; TNF = tumor necrosis factor; IVIG = intravenous immunoglobulin.

IL = interleukin; NSAIDs = non-steroidal anti-inflammatory drugs; JAKi = janus kinase inhibitors; TNF = tumor necrosis factor;

\* Includes apremilast, azathioprine, 6-mercaptopurine, leflunomide, sulfasalazine.

\*\* Includes calcineurin inhibitors (cyclosporine, tacrolimus), cyclophosphamide, thalidomide, and lenalidomide.

\*\*\*Includes belimumab, IL-1 inhibitors (anakinra, canakinumab, riloncept), IL-6 inhibitors (tocilizumab, sarilumab, siltuximab), IL-12/23 inhibitors (ustekinumab, guselkumab), IL-17 inhibitors (secukinumab, ixekizumab), eculizumab, mepolizumab and vedolizumab.
